# Supplementary material for: Proposal for Practical Approach in Prenatal Diagnosis of Beckwith–Wiedemann Syndrome and Review of the Literature
Source: MDPI journal article supplement (doi:10.3390/diagnostics12071709), 2022-07-13
Supplement: s1 [file s1]

**Table S2.** Common BWS molecular pathologies can be inferred from methylation-specific multiplex ligation-dependent probe amplification (MS-MLPA) of chromosome 11p15 and analyzed by subsequent genetic tests.

| Pathogeny             | MS-MLPA          |                 |             |             | Implications                                                                                                                                                         | Following genetic tests                                    |
|-----------------------|------------------|-----------------|-------------|-------------|----------------------------------------------------------------------------------------------------------------------------------------------------------------------|------------------------------------------------------------|
|                       | Methylation      |                 | CNV         |             |                                                                                                                                                                      |                                                            |
|                       | ICR1             | ICR2            | ICR1        | ICR2        |                                                                                                                                                                      |                                                            |
| ICR2 hypomethylation  | Normal           | Hypomethylation | No change   | No change   | 1. patUPD in ICR2<br>2. Simply methylation change                                                                                                                    | SNP-CMA, MS PCR, STR analysis                              |
|                       |                  |                 | No change   | Deletion    | Deletion in maternal ICR2                                                                                                                                            | CMA/SNP-CMA, karyotype, FISH                               |
|                       |                  |                 | No change   | Duplication | Duplication in paternal ICR2                                                                                                                                         | CMA/SNP-CMA, karyotype, FISH                               |
| ICR1 hypermethylation | Hypermethylation | Normal          | No change   | No change   | 1. patUPD in ICR1<br>2. Simply methylation change                                                                                                                    | SNP-CMA, MS PCR, STR analysis                              |
|                       |                  |                 | Deletion    | No change   | Deletion in maternal ICR1                                                                                                                                            | CMA/SNP-CMA, karyotype, FISH                               |
|                       |                  |                 | Duplication | No change   | Duplication in paternal ICR1                                                                                                                                         | CMA/SNP-CMA, karyotype, FISH                               |
| patUPD11p15.5         | Hypermethylation | Hypomethylation | No change   | No change   | patUPD11<br>1. Mutations in BWS-related genes ( <i>e.g.</i> , <i>CDK1C</i> )<br>2. Mosaicism<br>3. Chromosomal abnormalities<br>4. Molecular diagnosis not confirmed | SNP-CMA, STR analysis<br>DNA sequencing, MS PCR, karyotype |
| Others                | Normal           | Normal          | Normal      | Normal      |                                                                                                                                                                      |                                                            |

ICR1: imprinting control region 1; ICR2: imprinting control region 2; patUPD: paternal uniparental disomy; CNV: copy number variation; CMA: chromosome microarray analysis; SNP-CMA: single nucleotide polymorphism-CMA; MS PCR: methylation-specific polymerase chain reaction; STR: short tandem repeat; FISH: fluorescence *in situ* hybridization.
