# Supplementary material for: Proposal for Practical Approach in Prenatal Diagnosis of Beckwith–Wiedemann Syndrome and Review of the Literature
Source: MDPI journal article supplement (doi:10.3390/diagnostics12071709), 2022-07-13
Supplement: s1 [file s1]

**Table S1.** Prenatal ultrasound finding, genetic diagnosis, imprinting control region 1 (ICR1)/ICR2 methylation status, timing of diagnosis, and outcomes of 166 reported patients with Beckwith–Wiedemann Syndrome (BWS).

| Case no. | Prenatal ultrasound finding*                                                                                                      | Genetic diagnosis                                                                   | ICR1/ICR2 methylation status <sup>†</sup>        | Timing of diagnosis/outcomes | Reference                                |
|----------|-----------------------------------------------------------------------------------------------------------------------------------|-------------------------------------------------------------------------------------|--------------------------------------------------|------------------------------|------------------------------------------|
| 1        | Umbilical hernia                                                                                                                  | Normal aCGH                                                                         | ICR2 hypomethylation                             | Post/Live birth              | This study (Patient 1)                   |
| 2        | Omphalocele                                                                                                                       | Normal aCGH                                                                         | ICR2 hypomethylation                             | Pre/TOP                      | This study (Patient 2)                   |
| 3        | Nephromegaly, macroglossia                                                                                                        | arr[GRCh37] 11p15.5(1996741_2028877)×1 mat                                          | ICR1 hypermethylation                            | Pre/TOP                      | This study (Patient 3)                   |
| 4        | Omphalocele, corpus callosum hypoplasia, short femurs                                                                             | NR                                                                                  | ICR2 hypomethylation                             | Pre/TOP                      | Beaufrère et al. (2018) (Patient 1) [46] |
| 5        | Nuchal hypertranslucency, intrauterine growth restriction, omphalocele, feet deformity, facial dysmorphism, short corpus callosum | patUPD11p15.5                                                                       | ICR1 hypermethylation;<br>ICR2 hypomethylation   | Pre/TOP                      | Beaufrère et al. (2018) (Patient 2) [46] |
| 6        | Protruding tongue, nephromegaly, hepatomegaly, polyhydramnios, macrosomia                                                         | arr[GRCh37] 11p15.5(1632167_2527910)×3                                              | ICR1 hypermethylation                            | Pre/TOP                      | Wang et al. (2017) (Patient 1) [45]      |
| 7        | Left-sided congenital diaphragmatic hernia, polyhydramnios, macrosomia                                                            | arr[GRCh37] 11p15.5p14.3(196966_250338960)×3 dn, 11q24.3q25(9129510272_134868407)×1 | [ICR1 hypermethylation;<br>ICR2 hypomethylation] | Pre/TOP                      | Chen et al. (2016) [44]                  |
| 8        | Polyhydramnios, macrosomia, hepatomegaly                                                                                          | arr[GRCh37] 11p15.5p15.4(205983_4920324)×3 dn, 13q34(112350047_115091736)×1 dn      | ICR1 hypermethylation;<br>ICR2 hypomethylation   | Pre/Live birth               | Jurkiewicz et al. (2015) [43]            |
| 9        | Omphalocele                                                                                                                       | Normal aCGH                                                                         | ICR2 hypomethylation                             | Pre/NR                       | Chen et al. (2014) [42]                  |
| 10       | Intracardiac rhabdomyoma, polyhydramnios                                                                                          | NR                                                                                  | ICR1 hypermethylation;<br>ICR2 hypomethylation   | Post/Live birth              | Longardt et al. (2014) [41]              |
| 11       | Omphalocele                                                                                                                       | NR                                                                                  | ICR2 hypomethylation                             | Post/Live birth              | Moreira-Pinto et al. (2012) [40]         |
| 12       | Macroglossia, macrosomia, hepatomegaly, nephromegaly, cardiomegaly, polyhydramnios                                                | NR                                                                                  | ICR1 hypermethylation                            | Post/Live birth              | Guanciali-Franchi et al. (2012) [39]     |
| 13       | Hydropic placenta, hepatomegaly, polyhydramnios, macrosomia, macroglossia                                                         | NR                                                                                  | ICR2 hypomethylation                             | Post/Live birth              | Eckmann-Scholz et al. (2011) [38]        |
| 14       | Placental tumor, polyhydramnios, macroglossia, hepatomegaly, nephromegaly                                                         | patUPD11p15.5 and <i>CDKN1C</i> mutation were ruled out                             | ICR1 hypermethylation                            | Pre/Live birth               | Aoki et al. (2011) [37]                  |
| 15       | Nephromegaly, macroglossia                                                                                                        | patUPD11p15.5                                                                       | [ICR1 hypermethylation;<br>ICR2 hypomethylation] | Pre/Live birth               | Storm et al. (2011) [36]                 |
| 16       | Mesenteric cystic lesion                                                                                                          | Mosaic patUPD11p15.5                                                                | [ICR1 hypermethylation;<br>ICR2 hypomethylation] | Post/Live birth              | Sorrentino et al. (2010) [35]            |
| 17       | Omphalocele, open of the fourth ventricle, hypoplasia of the posterior vermis                                                     | NR                                                                                  | ICR2 hypomethylation                             | Post/Live birth              | Bui et al. (2009) [34]                   |
| 18       | Omphalocele                                                                                                                       | NR                                                                                  | ICR2 hypomethylation                             | Post/Live birth              | Ramadan et al. (2009) [33]               |
| 19       | Intracardiac tumor (right atrial mass)                                                                                            | NR                                                                                  | ICR1 hypermethylation                            | Post/Live birth              | Descartes et al. (2008) [32]             |
| 20       | Omphalocele, macrosomia                                                                                                           | <i>CDKN1C</i> mutation                                                              | NR                                               | Pre/Live birth               | Percesepe et al. (2008) [31]             |

|    |                                                                                                                            |                                                         |                                               |                 |                                        |
|----|----------------------------------------------------------------------------------------------------------------------------|---------------------------------------------------------|-----------------------------------------------|-----------------|----------------------------------------|
| 21 | Macrosomia, macroglossia, omphalocele, polyhydramnios, abdominal distention                                                | NR                                                      | ICR2 hypomethylation                          | Pre/TOP         | Ma et al. (2008) (Patient 1) [30]      |
| 22 | Macrosomia, macroglossia, polyhydramnios, cardiomegaly, nephromegaly                                                       | NR                                                      | ICR2 hypomethylation                          | Pre/TOP         | Ma et al. (2008) (Patient 2) [30]      |
| 23 | Omphalocele, polyhydramnios, macrosomia, macroglossia, nephromegaly                                                        | NR                                                      | ICR2 hypomethylation                          | Post/Live birth | Gomes et al. (2007) [29]               |
| 24 | Omphalocele                                                                                                                | Mosaic patUPD11p15.5                                    | [ICR1 hypermethylation; ICR2 hypomethylation] | Pre/TOP         | Grati et al. (2007) (Patient 1) [28]   |
| 25 | Omphalocele                                                                                                                | Mosaic patUPD11p15.5                                    | [ICR1 hypermethylation; ICR2 hypomethylation] | Pre/TOP         | Grati et al. (2007) (Patient 2) [28]   |
| 26 | Two-vessel cord, enlarged right atrium, foreshortened femurs, echogenic bowel                                              | NR                                                      | ICR1 hypermethylation                         | Post/Live birth | Aagaard-Tillery et al. (2007) [27]     |
| 27 | Renal cystic lesion                                                                                                        | NR                                                      | NR                                            | Post/Live birth | Gocmen et al. (2005) [26]              |
| 28 | Omphalocele, polyhydramnios, nephromegaly                                                                                  | NR                                                      | NR                                            | Pre/TOP         | Williams et al. (2005) (Patient 1) [1] |
| 29 | Omphalocele, hepatomegaly, nephromegaly, macroglossia                                                                      | NR                                                      | NR                                            | Post/Live birth | Williams et al. (2005) (Patient 2) [1] |
| 30 | Omphalocele, megacystis, ureteric dilatation, hydronephrosis                                                               | NR                                                      | ICR2 hypomethylation                          | Pre/TOP         | Sinico et al. (2004) [25]              |
| 31 | Enlarged placenta with cystic lesion, macrosomia, hepatomegaly, enlarged pancreas, multiple small cystic areas in placenta | Mosaic patUPD11p15.5 or paternal duplication of 11p15.5 | [ICR1 hypermethylation; ICR2 hypomethylation] | Pre/TOP         | Mulik et al. (2004) [24]               |
| 32 | Nephromegaly, biparietal diameter, head circumference, and abdominal circumference were increased for gestational age      | NR                                                      | ICR1 hypermethylation                         | Pre/TOP         | Le Caignec et al. (2004) [23]          |
| 33 | Intra-abdominal cyst, polyhydramnios                                                                                       | patUPD11p15.5                                           | [ICR1 hypermethylation; ICR2 hypomethylation] | Post/Live birth | Pelizzo et al. (2003) [22]             |
| 34 | Omphalocele, single umbilical artery, polyhydramnios, macrosomia                                                           | NR                                                      | NR                                            | Pre/Live birth  | Hamada et al. (2001) [21]              |
| 35 | Omphalocele, Dandy-Walker malformation, macroglossia, polyhydramnios, nephromegaly                                         | NR                                                      | ICR2 hypomethylation                          | Post/Live birth | Abbasi et al. (2021) (Patient 1) [47]  |
| 36 | Omphalocele                                                                                                                | NR                                                      | ICR2 hypomethylation                          | Post/Live birth | Abbasi et al. (2021) (Patient 2) [47]  |
| 37 | Omphalocele, polyhydramnios, placentomegaly                                                                                | NR                                                      | ICR2 hypomethylation                          | Pre/Live birth  | Abbasi et al. (2021) (Patient 3) [47]  |
| 38 | Omphalocele                                                                                                                | NR                                                      | ICR2 hypomethylation                          | Post/Live birth | Abbasi et al. (2021) (Patient 4) [47]  |
| 39 | Omphalocele, macrosomia, polyhydramnios                                                                                    | NR                                                      | ICR2 hypomethylation                          | Pre/Live birth  | Abbasi et al. (2021) (Patient 5) [47]  |

|       |                                                                                                                                                                                           |                                          |                                               |                             |                                        |
|-------|-------------------------------------------------------------------------------------------------------------------------------------------------------------------------------------------|------------------------------------------|-----------------------------------------------|-----------------------------|----------------------------------------|
| 40    | Omphalocele, macrosomia, polyhydramnios                                                                                                                                                   | NR                                       | ICR2 hypomethylation                          | Pre/Live birth              | Abbasi et al. (2021) (Patient 6) [47]  |
| 41    | Omphalocele, macrosomia, macroglossia, polyhydramnios                                                                                                                                     | NR                                       | ICR2 hypomethylation                          | Pre/Live birth              | Abbasi et al. (2021) (Patient 7) [47]  |
| 42    | Omphalocele                                                                                                                                                                               | NR                                       | ICR2 hypomethylation                          | Pre/Live birth              | Abbasi et al. (2021) (Patient 8) [47]  |
| 43    | Omphalocele, macroglossia, macrosomia, nephromegaly                                                                                                                                       | NR                                       | ICR2 hypomethylation                          | Pre/Live birth              | Abbasi et al. (2021) (Patient 9) [47]  |
| 44    | Omphalocele, Dandy-Walker malformation, echogenic bowel, liver calcifications, short long bones, punctate epiphyses, syndactyly, placentomegaly, polyhydramnios, fetal growth restriction | 11p15.4 deletion including <i>CDKN1C</i> | NR                                            | Pre/Live birth              | Abbasi et al. (2021) (Patient 10) [47] |
| 45    | Omphalocele, polyhydramnios                                                                                                                                                               | NR                                       | ICR2 hypomethylation                          | Pre/Live birth              | Abbasi et al. (2021) (Patient 11) [47] |
| 46    | Omphalocele, macrosomia, polyhydramnios                                                                                                                                                   | NR                                       | ICR2 hypomethylation                          | Pre/Live birth              | Abbasi et al. (2021) (Patient 12) [47] |
| 47    | Omphalocele, short cervix                                                                                                                                                                 | NR                                       | ICR2 hypomethylation                          | Post/Live birth             | Abbasi et al. (2021) (Patient 13) [47] |
| 48    | Omphalocele                                                                                                                                                                               | NR                                       | ICR2 hypomethylation                          | Pre/Live birth              | Abbasi et al. (2021) (Patient 14) [44] |
| 49    | Omphalocele, macrosomia, polyhydramnios, nephromegaly                                                                                                                                     | NR                                       | ICR2 hypomethylation                          | Pre/Live birth              | Abbasi et al. (2021) (Patient 5) [47]  |
| 50    | Omphalocele, macrosomia, polyhydramnios                                                                                                                                                   | NR                                       | ICR2 hypomethylation                          | Post/Live birth             | Abbasi et al. (2021) (Patient 16) [47] |
| 51    | Omphalocele, macrosomia, polyhydramnios                                                                                                                                                   | NR                                       | ICR2 hypomethylation                          | Pre/ <i>In utero</i> demise | Abbasi et al. (2021) (Patient 17) [47] |
| 52    | Omphalocele, cystic hygroma                                                                                                                                                               | NR                                       | ICR2 hypomethylation                          | Post/Live birth             | Abbasi et al. (2021) (Patient 18) [47] |
| 53    | Omphalocele, polyhydramnios, macroglossia                                                                                                                                                 | NR                                       | ICR2 hypomethylation                          | Post/Live birth             | Abbasi et al. (2021) (Patient 19) [47] |
| 54-70 | Omphalocele (15), macroglossia (5), placentomegaly (5), placental mesenchymal dysplasia (0), organomegaly (7), polyhydramnios (1), macrosomia (1)                                         | NR                                       | ICR2 hypomethylation                          | Pre/NR                      | Baker et al. (2021) (17 patients) [48] |
| 71    | Omphalocele (0), macroglossia (0), placentomegaly (0), placental mesenchymal dysplasia (0), organomegaly (1), polyhydramnios (1), macrosomia (0)                                          | NR                                       | ICR1 hypermethylation                         | Pre/NR                      | Baker et al. (2021) (1 patient) [48]   |
| 72-74 | Omphalocele (2), macroglossia (1), placentomegaly (0), placental mesenchymal dysplasia (0), organomegaly (1), polyhydramnios (0), macrosomia (0)                                          | patUPD11p15.5                            | [ICR1 hypermethylation; ICR2 hypomethylation] | Pre/NR                      | Baker et al. (2021) (3 patients) [48]  |

|         |                                                                                                                                                                |                                                                                                                          |                                                  |                 |                                           |
|---------|----------------------------------------------------------------------------------------------------------------------------------------------------------------|--------------------------------------------------------------------------------------------------------------------------|--------------------------------------------------|-----------------|-------------------------------------------|
| 75-77   | Omphalocele (3), macroglossia (0),<br>placentomegaly (1), placentomegaly<br>mesenchymal dysplasia (0), organomegaly<br>(0), polyhydramnios (0), macrosomia (1) | CDKN1C mutations                                                                                                         | NR                                               | Pre/NR          | Baker et al. (2021)<br>(3 patients) [48]  |
| 78-129  | Macroglossia (7), omphalocele (14),<br>macrosomia (13), organomegaly (0),<br>polyhydramnios (17), placentomegaly (2),<br>tumor (0)                             | NR                                                                                                                       | ICR2 hypomethylation                             | Post/Live birth | Carli et al. (2021)<br>(52 patients) [49] |
| 130-135 | Macroglossia (2), omphalocele (0),<br>macrosomia (5), organomegaly (2),<br>polyhydramnios (2), placentomegaly (0),<br>tumor (0)                                | NR                                                                                                                       | ICR1 hypermethylation                            | Post/Live birth | Carli et al. (2021)<br>(6 patients) [49]  |
| 136-157 | Macroglossia (1), omphalocele (1),<br>macrosomia (9), organomegaly (3),<br>polyhydramnios (7), placentomegaly (0),<br>tumor (1)                                | patUPD11p15.5                                                                                                            | [ICR1 hypermethylation;<br>ICR2 hypomethylation] | Post/Live birth | Carli et al. (2021)<br>(22 patients) [49] |
| 158-166 | Macroglossia (1), omphalocele (0),<br>macrosomia (5), organomegaly (1),<br>polyhydramnios (2), placentomegaly (0),<br>tumor (0)                                | 1. 1 case: der(Y)t(Y;11)(p11.32;p15.4+)<br>2. 2 cases: genetic analysis was not performed<br>3. 6 cases: negative result | NR                                               | Post/Live birth | Carli et al. (2021)<br>(9 patients) [49]  |

\*Numbers in the parentheses indicate the number of cases.  
 \*Methylation statuses in the square brackets are inferred from the results of molecular diagnosis.  
 patUPD: paternal uniparental disomy; GRCh37: genome reference consortium human build 37; mat: maternal origin; dn: de novo; Pre: prenatally; Post: postnatally; TOP: termination of pregnancy; NR: not reported.
